# Supplementary material for: Revealing Soil and Tree Leaves Deposited Particulate Matter PTE Relationship and Potential Sources in Urban Environment
Source: MDPI journal article supplement (doi:10.3390/ijerph181910412), 2021-10-03
Supplement: s1 [file s1]

# Revealing soil and tree leaves deposited particulate matter PTE relationship and potential sources in urban environment

Gevorg Tepanosyan<sup>1</sup>, Chiara Baldacchini<sup>2,3,\*</sup> and Lilit Sahakyan<sup>1</sup>

1 The Center for Ecological-Noosphere Studies of the National Academy of Sciences, Yerevan 0025, Abo-vian-68, Republic of Armenia

2 Biophysics and Nanoscience Centre Dipartimento di Scienze Ecologiche e Biologiche (DEB) - Università degli Studi della Toscana, Largo dell'Università snc, 01100 Viterbo, Italy

3 Istituto di Ricerca sugli Ecosistemi Terrestri - Consiglio Nazionale delle Ricerche (IRET-CNR), Via G. Marconi 2, 05010, Porano, Italy

\*Corresponding author: [baldacchini@unitus.it](mailto:baldacchini@unitus.it)

## SUPPLEMENTARY MATERIALS

- **SM Figure S1** Tree leaves particulate matter (PM) loads distribution and wind roses for the cities of Yerevan and Gyumri.
- **SM Figure S2** Spatial distribution in Yerevan of the content of potentially toxic element (PTE) in tree leaves.
- **SM Figure S3** Spatial distribution in Yerevan of the content of potentially toxic element (PTE) in soil.
- **SM Figure S4** Spatial distribution in Gyumri of the content of potentially toxic element (PTE) in tree leaves.
- **SM Figure S5** Spatial distribution in Gyumri of the content of potentially toxic element (PTE) in soil.
- **SM Table S1.** Spearman correlation matrix of element concentration data in Yerevan soil.
- **SM Table S2.** Spearman correlation matrix of element concentration data in Gyumri soil
- **SM Table S3.** Factor-variable correlation coefficients for the first two principal components (PC) obtained by a principal component analysis (PCA) with the element concentration data in soil and leaves as input variables, for both Yerevan and Gyumri.

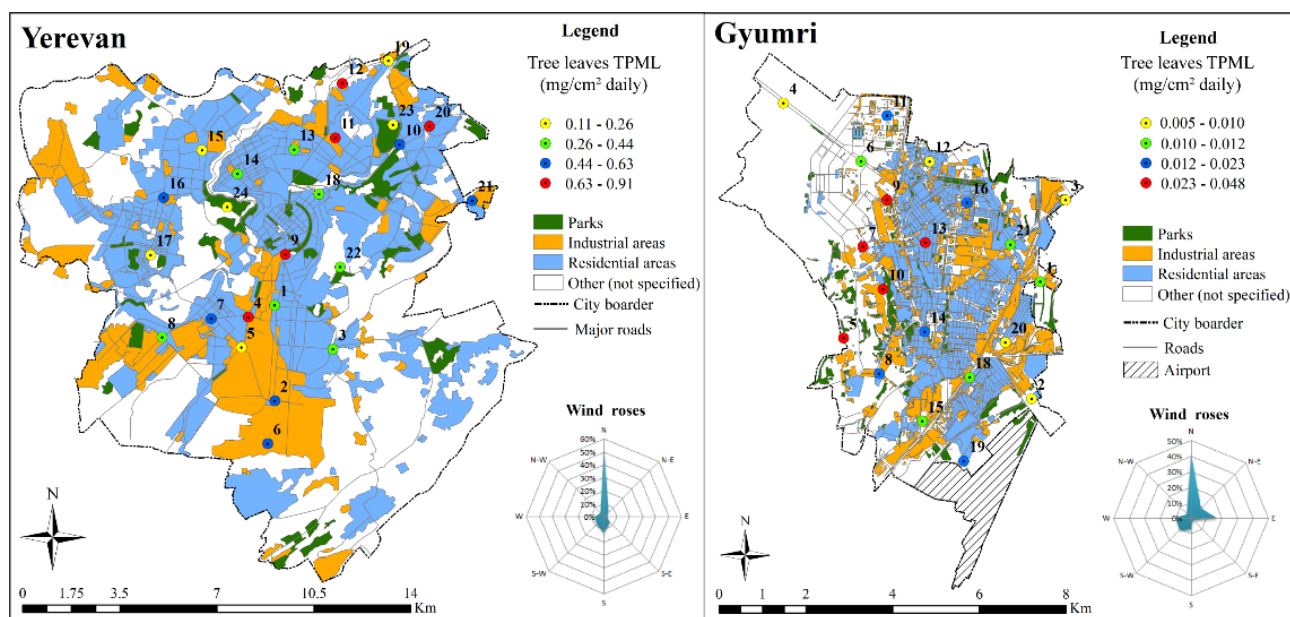

**SM Figure S1.** Tree leaves particulate matter (PM) loads distribution and wind roses for the cities of Yerevan and Gyumri.

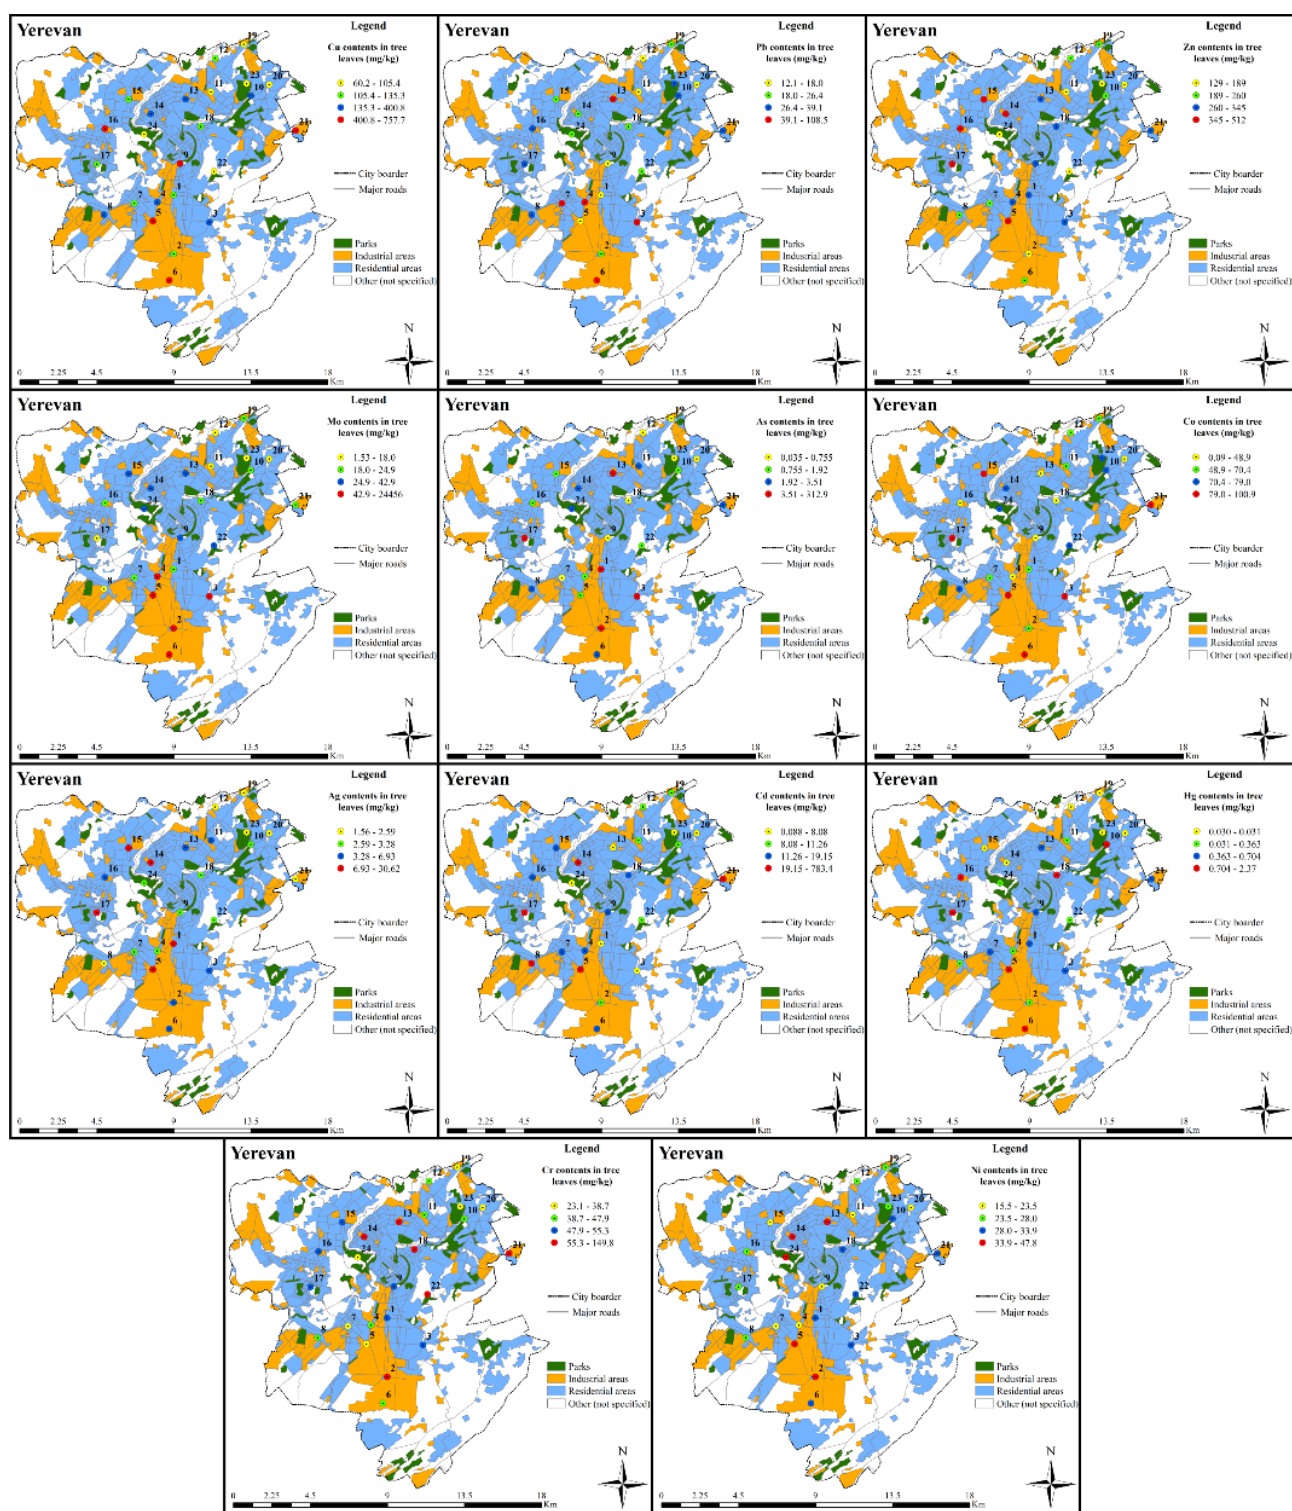

SM Figure S2. Spatial distribution in Yerevan of the content of potentially toxic element (PTE) in tree leaves.

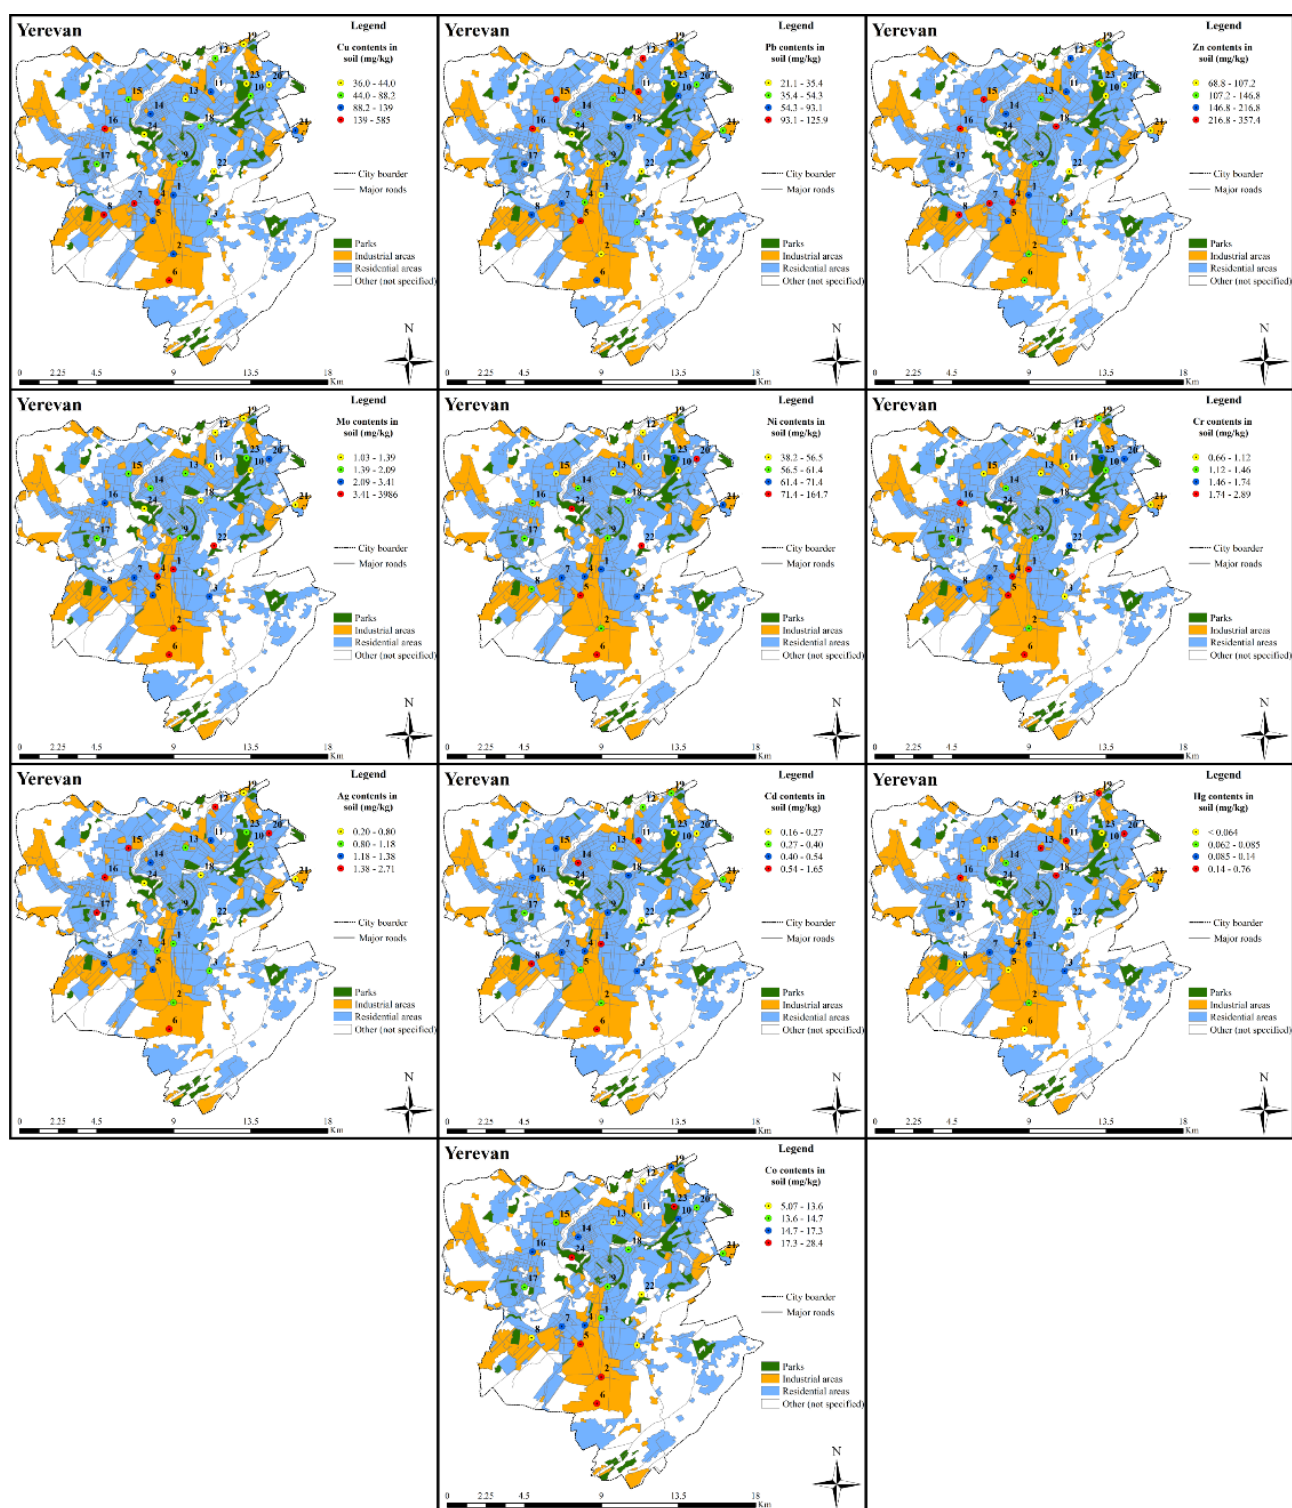

SM Figure S3. Spatial distribution in Yerevan of the content of potentially toxic element (PTE) in soil.



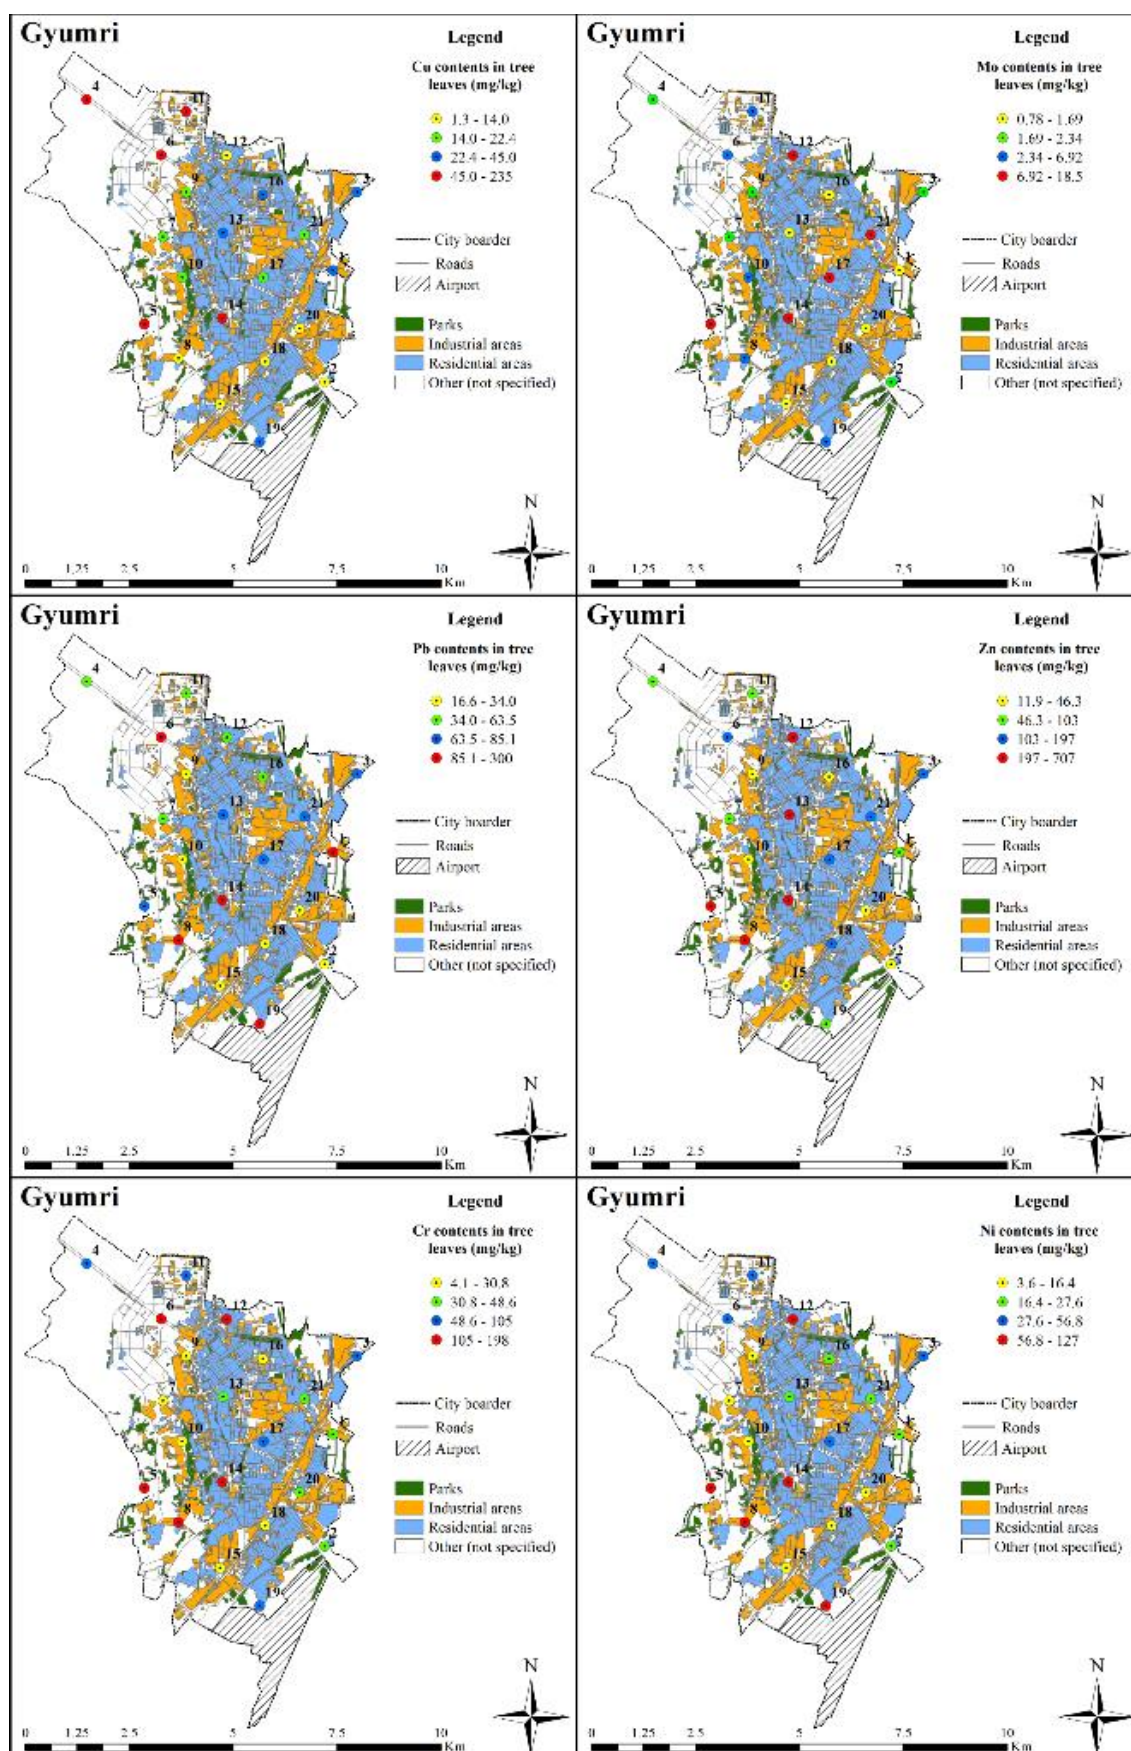

**SM Figure S4.** Spatial distribution in Gyumri of the content of potentially toxic element (PTE) in tree leaves.

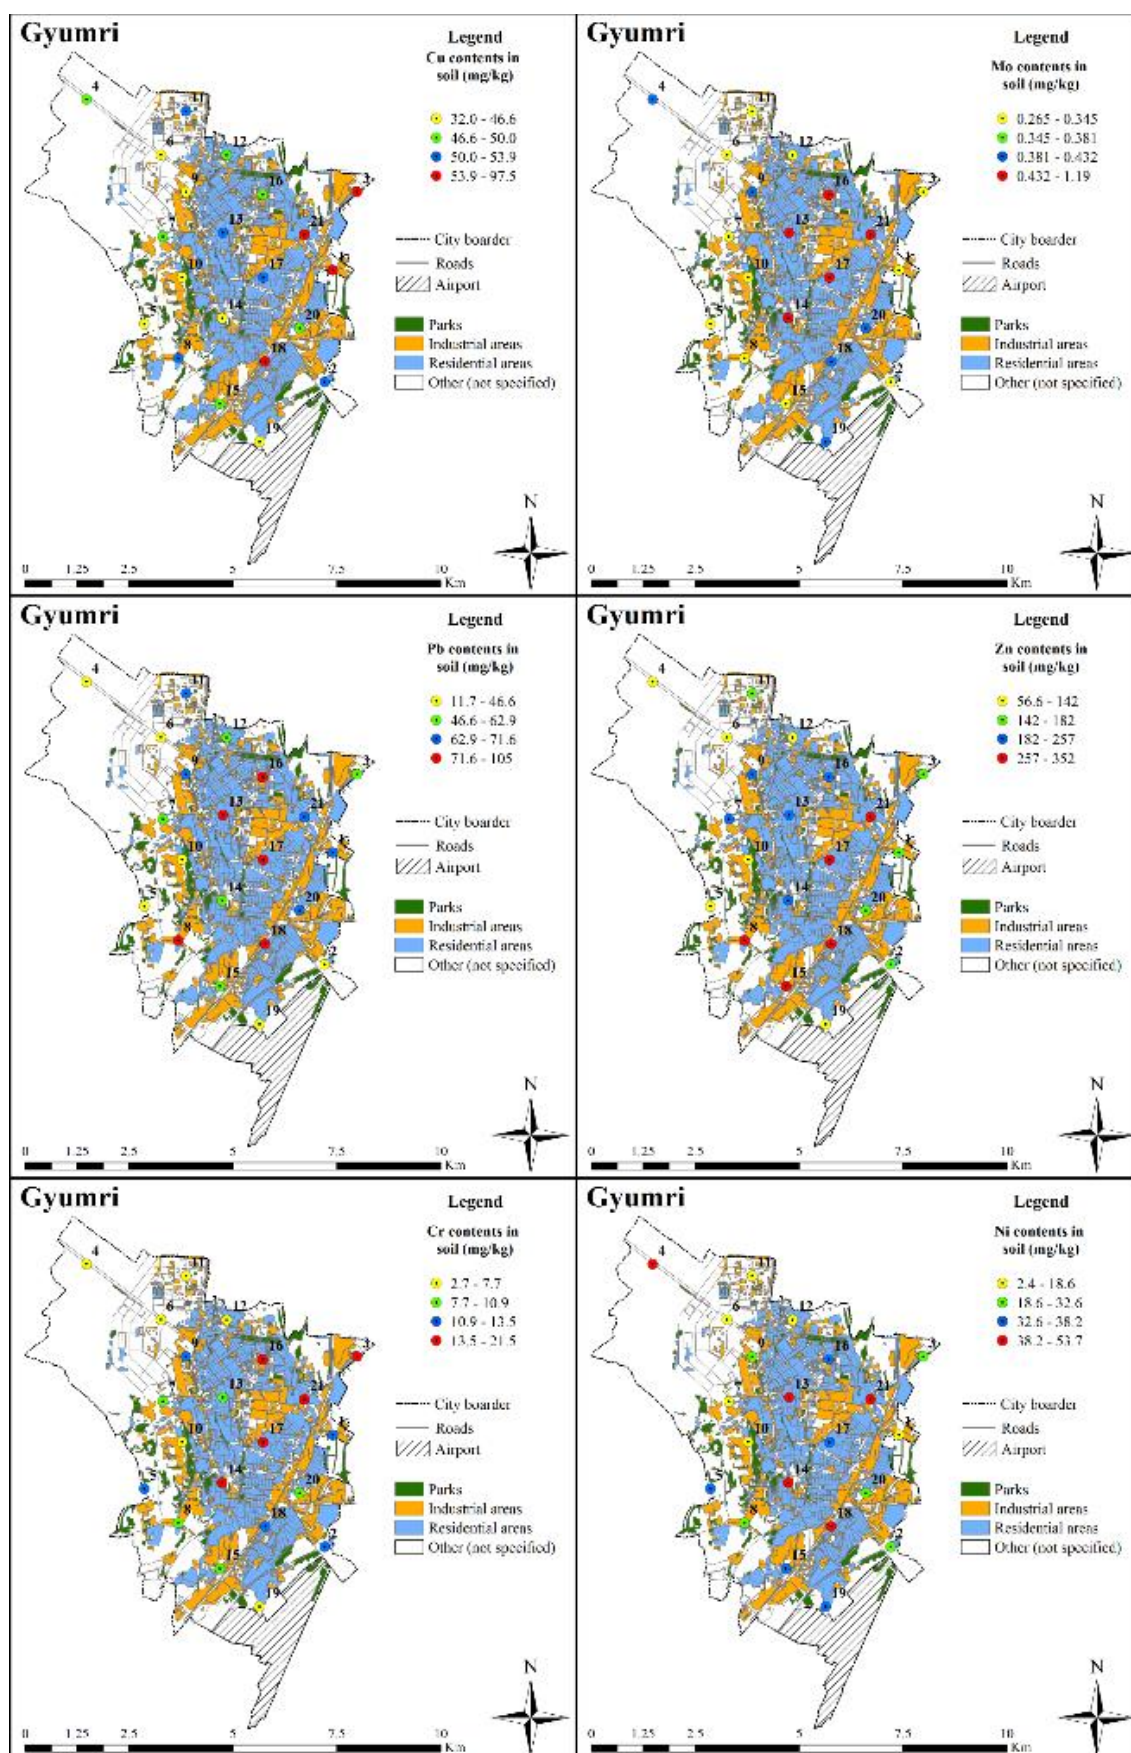

**SM Figure S5.** Spatial distribution in Gyumri of the content of potentially toxic element (PTE) in soil.

**SM Table S1.** Spearman correlation matrix of element concentration data in Yerevan soil.

| Parameters   | Ni_L          | Co_L           | As_L          | Ag_L          | Hg_L          | Cr_L  | Pb_L  | Mo_L  | Cd_L          | Zn_L          | Cu_L          | Ni_S          | Co_S  | Ag_S         | Cr_S         | Pb_S          | Mo_S  | Cd_S          | Zn_S          | Cu_S  |
|--------------|---------------|----------------|---------------|---------------|---------------|-------|-------|-------|---------------|---------------|---------------|---------------|-------|--------------|--------------|---------------|-------|---------------|---------------|-------|
| <b>TDL_L</b> |               |                |               |               |               |       |       |       |               |               |               |               |       |              |              |               |       |               |               |       |
| Ni_L         | 1.000         |                |               |               |               |       |       |       |               |               |               |               |       |              |              |               |       |               |               |       |
| Co_L         | .330          | 1.000          |               |               |               |       |       |       |               |               |               |               |       |              |              |               |       |               |               |       |
| As_L         | <b>.585**</b> | .290           | 1.000         |               |               |       |       |       |               |               |               |               |       |              |              |               |       |               |               |       |
| Ag_L         | .363          | .185           | <b>.574**</b> | 1.000         |               |       |       |       |               |               |               |               |       |              |              |               |       |               |               |       |
| Hg_L         | .396          | -.050          | .268          | .311          | 1.000         |       |       |       |               |               |               |               |       |              |              |               |       |               |               |       |
| Cr_L         | <b>.448*</b>  | -.026          | <b>.437*</b>  | .261          | .196          | 1.000 |       |       |               |               |               |               |       |              |              |               |       |               |               |       |
| Pb_L         | .003          | .188           | .320          | -.048         | .127          | -.048 | 1.000 |       |               |               |               |               |       |              |              |               |       |               |               |       |
| Mo_L         | .376          | .193           | .292          | <b>.511*</b>  | .082          | .293  | .090  | 1.000 |               |               |               |               |       |              |              |               |       |               |               |       |
| Cd_L         | -.022         | .159           | .011          | .203          | .287          | .281  | .042  | .019  | 1.000         |               |               |               |       |              |              |               |       |               |               |       |
| Zn_L         | .128          | .115           | .226          | <b>.596**</b> | <b>.482*</b>  | .290  | .102  | .206  | <b>.659**</b> | 1.000         |               |               |       |              |              |               |       |               |               |       |
| Cu_L         | .170          | .061           | .274          | .326          | <b>.554**</b> | .219  | .254  | .311  | <b>.593**</b> | <b>.694**</b> | 1.000         |               |       |              |              |               |       |               |               |       |
| Ni_S         | .149          | .303           | .028          | -.013         | .066          | -.217 | -.041 | .187  | -.041         | -.106         | .000          | 1.000         |       |              |              |               |       |               |               |       |
| Co_S         | .190          | .205           | -.044         | .194          | .052          | -.283 | .035  | .305  | .077          | -.042         | .123          | .351          | 1.000 |              |              |               |       |               |               |       |
| Ag_S         | -.339         | .016           | -.079         | .205          | -.192         | -.143 | -.047 | -.184 | .234          | .328          | .171          | -.056         | -.226 | 1.000        |              |               |       |               |               |       |
| Cr_S         | -.021         | -.215          | -.168         | -.026         | .074          | -.229 | -.128 | -.010 | .063          | .005          | .064          | <b>.689**</b> | .402  | -.124        | 1.000        |               |       |               |               |       |
| Pb_S         | -.254         | .010           | -.217         | .026          | .182          | -.165 | .150  | -.172 | .408          | <b>.423*</b>  | .254          | <b>-.466*</b> | -.271 | <b>.454*</b> | -.373        | 1.000         |       |               |               |       |
| Mo_S         | -.073         | -.059          | .133          | .189          | -.200         | .187  | -.002 | .273  | -.015         | .022          | .034          | .397          | -.063 | .276         | <b>.469*</b> | -.284         | 1.000 |               |               |       |
| Cd_S         | -.200         | -.147          | .193          | .313          | -.004         | .173  | .024  | -.020 | <b>.441*</b>  | <b>.477*</b>  | .344          | -.164         | -.152 | .319         | .099         | .294          | .270  | 1.000         |               |       |
| Zn_S         | -.255         | -.263          | -.044         | .178          | .049          | .058  | .223  | -.081 | <b>.535**</b> | <b>.599**</b> | .361          | -.297         | -.158 | .374         | .129         | <b>.608**</b> | .208  | <b>.771**</b> | 1.000         |       |
| Cu_S         | -.132         | -.051          | .176          | .221          | .207          | .060  | .209  | .114  | <b>.531**</b> | <b>.419*</b>  | <b>.578**</b> | .073          | .080  | .319         | .217         | .392          | .347  | <b>.756**</b> | <b>.665**</b> | 1.000 |
| Hg_S         | -.116         | <b>-.609**</b> | -.009         | .163          | .051          | -.050 | -.015 | -.048 | -.208         | .085          | -.236         | -.304         | -.155 | -.057        | -.062        | .022          | .097  | .054          | .211          | -.104 |

\*\* . Correlation is significant at the 0.01 level (2-tailed).

\* . Correlation is significant at the 0.05 level (2-tailed).

**SM Table S2.** Spearman correlation matrix of element concentration data in Gyumri soil.

| Parameters   | Mo_L          | Pb_L          | Ni_L          | Cr_L          | Cu_L  | Zn_L  | Mo_S          | Pb_S          | Ni_S         | Cr_S         | Cu_S          |
|--------------|---------------|---------------|---------------|---------------|-------|-------|---------------|---------------|--------------|--------------|---------------|
| <b>TDL_L</b> |               |               |               |               |       |       |               |               |              |              |               |
| Mo_L         | 1.000         |               |               |               |       |       |               |               |              |              |               |
| Pb_L         | <b>.526*</b>  | 1.000         |               |               |       |       |               |               |              |              |               |
| Ni_L         | <b>.762**</b> | <b>.847**</b> | 1.000         |               |       |       |               |               |              |              |               |
| Cr_L         | <b>.808**</b> | <b>.801**</b> | <b>.961**</b> | 1.000         |       |       |               |               |              |              |               |
| Cu_L         | .192          | <b>.494*</b>  | .401          | .330          | 1.000 |       |               |               |              |              |               |
| Zn_L         | <b>.605**</b> | <b>.714**</b> | <b>.794**</b> | <b>.820**</b> | .290  | 1.000 |               |               |              |              |               |
| Mo_S         | -.112         | .073          | -.057         | -.062         | .227  | .060  | 1.000         |               |              |              |               |
| Pb_S         | -.395         | -.108         | -.274         | -.310         | -.263 | -.016 | <b>.482*</b>  | 1.000         |              |              |               |
| Ni_S         | -.070         | -.008         | .049          | .036          | .077  | .281  | <b>.585**</b> | .296          | 1.000        |              |               |
| Cr_S         | -.003         | .137          | -.016         | -.027         | .075  | .141  | <b>.459*</b>  | <b>.479*</b>  | <b>.462*</b> | 1.000        |               |
| Cu_S         | -.276         | .010          | -.207         | -.138         | -.288 | .015  | .181          | <b>.542*</b>  | .154         | <b>.466*</b> | 1.000         |
| Zn_S         | -.271         | -.153         | -.268         | -.260         | -.292 | .055  | <b>.449*</b>  | <b>.786**</b> | <b>.438*</b> | <b>.541*</b> | <b>.563**</b> |

\*\* . Correlation is significant at the 0.01 level (2-tailed).

\* . Correlation is significant at the 0.05 level (2-tailed).

**SM Table S3.** Factor-variable correlation coefficients for the first two principal components (PC) obtained by a principal component analysis (PCA) with the element concentration data in soil and leaves as input variables, for both Yerevan and Gyumri.

| <b>Variables</b> | <b>PC1</b> | <b>PC2</b> |
|------------------|------------|------------|
| <b>Yerevan</b>   |            |            |
| Ni_levae         | 0,323      | 0,458      |
| Co_levae         | 0,305      | 0,232      |
| Ag_levae         | -0,264     | 0,574      |
| Hg_levae         | -0,313     | 0,484      |
| Cr_levae         | 0,405      | 0,357      |
| Pb_levae         | -0,095     | 0,017      |
| Mo_levae         | 0,245      | 0,459      |
| Cd_levae         | -0,144     | 0,381      |
| Zn_levae         | -0,692     | 0,449      |
| Cu_levae         | -0,508     | 0,433      |
| Ni_soils         | 0,118      | 0,600      |
| Co_soils         | 0,219      | 0,451      |
| Ag_soils         | -0,428     | -0,145     |
| Hg_soils         | 0,182      | -0,455     |
| Cr_soils         | -0,191     | 0,444      |
| Pb_soils         | -0,693     | -0,309     |
| Mo_soils         | 0,226      | 0,382      |
| Cd_soils         | -0,515     | 0,005      |
| Zn_soils         | -0,836     | -0,078     |
| Cu_soils         | -0,723     | 0,019      |
| <b>Gyumri</b>    |            |            |
| Ni_leaves        | 0,969      | 0,188      |
| Cr_leaves        | 0,953      | 0,165      |
| Pb_leaves        | 0,781      | 0,008      |
| Mo_leaves        | 0,662      | 0,071      |
| Zn_leaves        | 0,939      | -0,093     |
| Cu_leaves        | 0,722      | 0,124      |
| Ni_soil          | 0,286      | -0,589     |
| Cr_soil          | 0,275      | -0,779     |
| Pb_soil          | -0,019     | -0,680     |
| Mo_soil          | 0,053      | -0,754     |
| Zn_soil          | 0,086      | -0,785     |
| Cu_soil          | -0,099     | -0,829     |
